# Supplementary material for: A Custom DNA-Based NGS Panel for the Molecular Characterization of Patients With Diffuse Gliomas: Diagnostic and Therapeutic Applications
Source: Front Oncol. 2022 Mar 17;12:861078. doi: 10.3389/fonc.2022.861078 (PMC8969903; doi:10.3389/fonc.2022.861078)
Supplement: Supplementary file 7 [file Table_4.xlsx]

## Sheet: Foglio1
Supplemental Table 4: Histo-molecular characteristics of analysed samples employing conventional and NGS techniques
UPN	Classification and nomenclature before 2021 WHO Classification of Tumors of the Central Nervous System	MAPD	IDH1		ATRX		1p/19q		CDKN2A/B		TERT promoter mutation		EGFR Ampl		chr7 imbalance		chr10 loss		H3F3A		BRAF		TP53		MGMT methylation (average allelic frequency 4 CpG islands)	Other alterations:
			NGS	IHC	NGS	IHC (status)	NGS	FISH	NGS	FISH	NGS	Sanger	NGS	FISH	NGS	FISH	NGS	FISH	NGS	IHC	NGS	IHC	NGS	IHC (overexpression)	NGS	NGS
1	Anaplastic astrocytoma IDH wt (grade III)	0.899	WT	WT	WT	retained	intact	N.D.	N.D.	N.D.	-C250T	-C250T	N.D.	NO	YES	N.D.	YES	N.D.	WT	N.D.	WT	WT	WT	NO	0.00%	PIK3CA: p.Ile391Met
2	GBM IDH wt (grade IV)	0.396	WT	WT	WT	retained	codel	N.D.	retained	N.D.	WT	WT	NO	NO	NO	N.D.	YES	N.D.	WT	N.D.	WT	WT	p.Glu258Lys	YES	43.00%	RB1: c.380+1G>A; PIK3R1: p.Met326Ile
3	GBM IDH wt (grade IV)	0.563	WT	WT	WT	retained	intact	N.D.	N.D.	N.D.	N.D.	N.D.	N.D.	NO	YES	N.D.	YES	N.D.	WT	N.D.	WT	WT	WT	NO	79.00%	EGFR: p.Ala289Thr; PIK3CA: p.Gly118Asp, p.Ile391Met
4	GBM IDH wt (grade IV)	0.823	WT	WT	WT	retained	intact	N.D.	N.D.	N.D.	-C228T	-C228T	N.D.	NO	YES	N.D.	YES	N.D.	WT	N.D.	WT	WT	WT	NO	21.00%	PIK3R1: p.Met326Ile
5	GBM IDH wt (grade IV)	1040	WT	WT	WT	retained	intact	N.D.	N.D.	N.D.	N.D.	N.D.	N.D.	NO	YES	N.D.	YES	N.D.	WT	N.D.	WT	WT	WT	NO	18.00%	PDGFRA: p.Ala7Val; PIK3CA: p.Ile391Met
6	Gliosarcoma (grade IV)	0.566	WT	WT	WT	retained	intact	N.D.	N.D.	N.D.	N.D.	N.D.	N.D.	NO	YES	N.D.	YES	N.D.	WT	N.D.	WT	WT	p.Leu265Pro	YES	0.00%	PDGFRA: p.Ser851Leu; RB1: p.Arg358Ter
7	GBM IDH wt (grade IV)	0.493	WT	WT	WT	retained	intact	N.D.	N.D.	N.D.	N.D.	N.D.	N.D.	NO	YES	N.D.	YES	N.D.	WT	N.D.	WT	WT	WT	NO	3.00%	PIK3R1: p.Met326Ile
8	Anaplastic astrocytoma IDH wt (grade III)	0.460	WT	WT	WT	retained	intact	N.D.	retained	N.D.	N.D.	N.D.	YES	YES	YES	N.D.	YES	N.D.	WT	N.D.	WT	WT	WT	NO	60.00%	PIK3CA: p.Pro104Leu, p.Ile391Met
9	GBM IDH wt (grade IV)	0.308	WT	WT	WT	retained	intact	N.D.	retained	N.D.	N.D.	N.D.	NO	NO	YES	N.D.	YES	N.D.	WT	N.D.	WT	WT	WT	NO	0.00%	KIT: gain; PDGFRA: gain; MET: p.Val136Ile, p.Ile316Met
10	GBM IDH wt (grade IV)	0.475	WT	WT	WT	retained	intact	N.D.	N.D.	N.D.	-C250T	-C250T	N.D.	NO	YES	N.D.	YES	N.D.	WT	N.D.	WT	WT	WT	NO	0.63%	EGFR: p.Ala289Thr
11	GBM IDH wt (grade IV)	0.691	WT	WT	WT	retained	intact	N.D.	N.D.	N.D.	-C250T	-C250T	N.D.	NO	NO	N.D.	YES	N.D.	WT	N.D.	WT	WT	WT	NO	0.94%	PIK3R1: p.Met326Ile
12	GBM IDH wt (grade IV)	0.570	WT	WT	WT	retained	intact	N.D.	N.D.	N.D.	WT	WT	N.D.	NO	YES	N.D.	YES	N.D.	WT	N.D.	WT	WT	WT	NO	0.67%
13	GBM IDH wt (grade IV)	0.319	WT	WT	WT	retained	intact	N.D.	retained	N.D.	WT	WT	NO	NO	YES	N.D.	YES	N.D.	WT	N.D.	WT	WT	p.His214Arg, p.Arg175His	YES	0.85%
14	GBM IDH wt (grade IV)	0.413	WT	WT	WT	retained	intact	N.D.	Homozygous deletion	N.D.	-C228T	-C228T	NO	NO	YES	N.D.	YES	N.D.	WT	N.D.	WT	WT	p.Cys176Ser	YES	0.46%	MET: gain
15	GBM IDH wt (grade IV)	0.291	WT	WT	WT	retained	intact	N.D.	retained	N.D.	WT	WT	NO	NO	YES	N.D.	YES	N.D.	WT	N.D.	WT	WT	WT	NO	0.64%	RB1: p.Arg251Ter; PIK3R1: p.Met326Ile; PIK3CA: p.Ile391Met
16	GBM IDH wt (grade IV)	0.513	WT	WT	WT	retained	intact	N.D.	N.D.	N.D.	-C228T	-C228T	N.D.	NO	YES	N.D.	YES	N.D.	WT	N.D.	WT	WT	p.Tyr220Cys	YES	0.75%
17	GBM IDH wt (grade IV)	0.360	WT	WT	WT	retained	intact	N.D.	retained	N.D.	-C250T	-C250T	NO	NO	YES	N.D.	YES	N.D.	WT	N.D.	WT	WT	WT	NO	0.60%	KIT: gain; PDGFRA: gain
18	GBM IDH wt (grade IV)	0.353	WT	WT	WT	retained	intact	N.D.	retained	N.D.	N.D.	N.D.	NO	NO	YES	N.D.	YES	N.D.	WT	N.D.	WT	WT	p.Val216Met	YES	0.00%	CDK6: p.Ser317Cys
19	Oligodendroglioma IDH mut, 1p/19q codel (grade II)	0.298	R132H	R132H	WT	retained	codel	codel	retained	N.D.	N.D.	N.D.	NO	NO	NO	N.D.	NO	N.D.	WT	N.D.	WT	WT	WT	NO	0.40%
20	GBM IDH wt (grade IV)	0.266	WT	WT	WT	retained	intact	N.D.	retained	N.D.	WT	WT	NO	NO	NO	N.D.	YES	N.D.	WT	N.D.	WT	WT	p.Glu286Lys	YES	0.04%	KIT: gain; PDGFRA: gain; PIK3R1: p.Met326Ile
21	GBM IDH wt (grade IV)	0.528	WT	WT	WT	retained	intact	N.D.	N.D.	N.D.	N.D.	N.D.	N.D.	NO	YES	N.D.	YES	N.D.	WT	N.D.	WT	WT	WT	NO	0.00%
22	GBM IDH wt (grade IV)	0.467	WT	WT	WT	retained	intact	N.D.	N.D.	N.D.	-C228T	-C228T	N.D.	NO	YES	N.D.	YES	N.D.	WT	N.D.	WT	WT	p.Tyr163Cys; p.Trp146Ter	YES	N.D.	RB1: p.Gln597Ter, p.Trp681Ter;
23	GBM IDH wt (grade IV)	0.317	WT	WT	WT	retained	intact	N.D.	Homozygous deletion	N.D.	-C250T	-C250T	NO	NO	YES	N.D.	YES	N.D.	WT	N.D.	WT	WT	WT	N.D.	0.00%	MET: p.Thr1010Ile
24	GBM IDH wt (grade IV)	0.482	WT	WT	WT	retained	intact	N.D.	N.D.	N.D.	-C250T	-C250T	N.D.	N.D.	YES	N.D.	YES	N.D.	WT	N.D.	WT	WT	WT	NO	0.08%	EGFR: pCys571Ser
25	GBM IDH wt (grade IV)	0.625	WT	WT	WT	retained	intact	N.D.	N.D.	N.D.	-C250T	-C250T	N.D.	N.D.	YES	N.D.	YES	N.D.	WT	N.D.	WT	WT	WT	NO	0.85%
26	GBM IDH wt (grade IV)	0.246	WT	WT	WT	retained	intact	N.D.	retained	N.D.	-C228T	-C228T	NO	NO	NO	N.D.	YES	N.D.	WT	N.D.	WT	WT	p.Val157Gly	YES	0.85%
27	Anaplastic oligodendroglioma IDH mut , 1p/19q codel (grade III)	0.259	R132H	R132H	WT	retained	codel	codel	retained	N.D.	-C228T	-C228T	NO	NO	NO	N.D.	NO	N.D.	WT	N.D.	WT	WT	WT	NO	76.27%	PIK3R1: gain; PIK3CA: p.Glu453del
28	Anaplastic ganglioglioma (grade III)	0.352	WT	WT	WT	retained	intact	N.D.	retained	N.D.	N.D.	N.D.	NO	NO	NO	NO	NO	NO	WT	N.D.	WT	WT	WT	NO	0.70%
29	GBM IDH wt (grade IV)	0.475	WT	WT	WT	retained	intact	N.D.	retained	N.D.	-C250T	-C250T	N.D.	YES	YES	YES	YES	YES	WT	N.D.	WT	WT	WT	NO	81.8%	KIT: gain; PDGFRA: gain; PIK3R1:gain
30	Anaplastic astrocytoma IDH wt (grade III)	0.269	WT	WT	WT	retained	intact	N.D.	Hemizygous deletion	Hemizygous deletion	N.D.	N.D.	NO	YES	YES	YES	YES	YES	WT	N.D.	WT	WT	WT	NO	0.74%	EGFR: p.Gly598Val
31	GBM IDH wt (grade IV)	0.393	WT	WT	WT	retained	intact	N.D.	retained	retained	-C250T	-C250T	NO	NO	YES	YES	YES	YES	WT	N.D.	WT	WT	WT	YES	0.78%	MDM4: gain; KIT: gain; PDGFRA: gain
32	Anaplastic oligodendroglioma IDH mut , 1p/19q codel (grade III)	0.189	R132H	R132H	WT	retained	codel	codel	retained	retained	N.D.	N.D.	NO	NO	NO	NO	NO	NO	WT	N.D.	WT	WT	WT	NO	0.67%	EGFR: p.Ser306Leu; PIK3CA: p.Val344Met; PIK3R1: p.Gly376Arg
33	GBM IDH mut (grade IV)	0.212	R132H	R132H	WT	loss	intact	N.D.	retained	retained	N.D.	N.D.	NO	NO	NO	NO	NO	NO	WT	N.D.	WT	WT	p.Tyr220Cys	YES	0.78%	EGFR: p.Gly632Asp; PIK3CA: p.GLu545Lys; PIK3R1: gain; PDGFRA p.Asp842Val;
34	GBM IDH wt (grade IV)	0.445	WT	WT	WT	retained	intact	N.D.	retained	retained	-C250T	-C250T	N.D.	YES	NO	NO	YES	YES	WT	N.D.	WT	WT	WT	NO	0.52%	KIT: gain; PDGFRA: gain; PIK3R1: gain
35	GBM IDH wt (grade IV)	0.219	WT	WT	WT	retained	intact	intact	Hemizygous deletion	Hemizygous deletion	-C228T	-C228T	NO	NO	YES	YES	YES	YES	WT	N.D.	WT	WT	WT	NO	0.73%
36	GBM IDH wt (grade IV)	0.518	WT	WT	WT	retained	intact	N.D.	N.D.	N.D.	-C228T	-C228T	N.D.	NO	YES	YES	YES	YES	WT	N.D.	WT	WT	WT	NO	75.5%	PIK3R1: p.Gly376Arg
37	Diffuse midline glioma, H3 K27M-mutant (grade IV)	0.274	WT	WT	p.Lys698Ter	loss	intact	N.D.	retained	N.D.	WT	WT	NO	NO	NO	NO	NO	NO	K27M	K27M	WT	WT	p.Arg273Cys	YES	0.66%	RB1: p.Arg358Ter; RB1: loss; KIT: gain; PDGFRA: gain;
38	Oligodendroglioma IDH mut , 1p/19q codel (grade II)	0.274	R132H	R132H	WT	retained	codel	codel	retained	N.D.	-C228T	-C228T	NO	NO	NO	NO	NO	NO	WT	N.D.	WT	WT	WT	NO	0.38%	PIK3CA: p.Ile391Met
39	Ganglioglioma (grade I)	0.155	WT	WT	WT	retained	intact	N.D.	retained	N.D.	WT	WT	NO	NO	NO	NO	NO	NO	WT	N.D.	p.Val600Glu	WT	WT	NO	N.D.	PIK3CA: p.Ile391Met
40	GBM IDH wt (grade IV)	0.349	WT	WT	WT	retained	intact	N.D.	Hemizygous deletion	Hemizygous deletion	WT	WT	NO	NO	YES	YES	NO	NO	WT	N.D.	WT	WT	p.Arg283Cys	YES	N.D.	MET: gain
41	Oligodendroglioma IDH mut , 1p/19q codel (grade II)	0.530	R132H	R132H	WT	retained	codel	codel	retained	N.D.	-C228T	-C228T	N.D.	NO	NO	NO	NO	NO	WT	N.D.	WT	WT	WT	NO	0.97%
42	GBM IDH wt (grade IV)	0.368	WT	WT	WT	retained	intact	N.D.	retained	retained	N.D.	N.D.	YES	YES	YES	YES	YES	YES	WT	N.D.	WT	WT	p.Trp146Ter	NO	90.60%	PIK3CA: p.Ile391Met
43	GBM IDH wt (grade IV)	0.383	WT	WT	WT	retained	intact	intact	Hemizygous deletion	Hemizygous deletion	WT	WT	NO	NO	NO	NO	NO	NO	WT	N.D.	WT	WT	WT	NO	76.35%	MDM4: gain; KIT: gain; PDGFRA: gain; PDGFRA: p.Gly79Asp; KRAS: p.Gly15Ala
44	GBM IDH wt (grade IV)	0.149	WT	WT	WT	retained	intact	N.D.	Hemizygous deletion	N.D.	-C228T	-C228T	NO	NO	YES	YES	YES	YES	WT	N.D.	WT	WT	p.Glu339Ter, p.Arg248Trp	YES	0.17%	PIK3CA: p.Arg4Ter
45	GBM IDH wt (grade IV)	0.445	WT	WT	WT	retained	intact	N.D.	Homozygous deletion	N.D.	N.D.	N.D.	NO	NO	YES	YES	YES	YES	WT	N.D.	WT	WT	WT	NO	35.50%	BRAF: gain
46	GBM IDH wt (grade IV)	0.528	WT	WT	WT	retained	intact	intact	retained	retained	-C228T	-C228T	N.D.	NO	YES	YES	YES	YES	WT	N.D.	WT	WT	WT	NO	0.33%
47	GBM IDH wt (grade IV)	0.298	WT	WT	WT	retained	intact	N.D.	Hemizygous deletion	N.D.	-C228T	-C228T	NO	NO	YES	YES	YES	YES	WT	N.D.	WT	WT	WT	NO	0.58%	PDGFRA: gain; CDK4: gain
48	Anaplastic ganglioglioma (grade III)	0.154	WT	WT	WT	retained	intact	N.D.	retained	retained	-C228T	-C228T	NO	NO	YES	YES	YES	YES	WT	N.D.	WT	WT	p.Arg273His	NO	37.12%	CDK4: gain
49	Anaplastic astrocytoma IDH-mut (grade III)	0.278	R132S	WT	p.Lys329IlefsTer3	loss	intact	N.D.	Homozygous deletion	N.D.	WT	WT	NO	NO	YES	YES	YES	YES	WT	N.D.	WT	WT	p.Arg306Ter	YES	77.22%	KRAS: gain
50	GBM IDH wt (grade IV)	0.184	WT	WT	WT	retained	intact	N.D.	Homozygous deletion	Homozygous deletion	-C228T	-C228T	NO	NO	YES	YES	YES	YES	WT	N.D.	WT	WT	WT	NO	75.15%
51	GBM IDH wt (grade IV)	0.155	WT	WT	WT	retained	intact	intact	retained	retained	-C228T	-C228T	NO	NO	NO	NO	YES	YES	WT	N.D.	WT	WT	WT	NO	88.50%
52	GBM IDH wt (grade IV)	0.360	WT	WT	WT	retained	intact	N.D.	retained	retained	-C228T	-C228T	NO	NO	YES	YES	YES	YES	WT	N.D.	WT	WT	WT	NO	54.80%	KIT: gain; PDGFRA: gain
53	GBM IDH wt (grade IV)	0.776	WT	WT	WT	retained	intact	N.D.	retained	retained	-C228T	-C228T	N.D.	NO	YES	YES	YES	YES	WT	N.D.	WT	WT	WT	NO	96.60%	PIK3R1: p.Gly376Arg; KRAS: p.GLy15Ala
54	Diffuse astrocytoma IDH-mut (grade II)	0.138	R132H	R132H	p.Ala1988ValfsTer27	loss	intact	N.D.	retained	N.D.	WT	WT	NO	NO	NO	NO	NO	NO	WT	N.D.	WT	WT	p.Arg267Trp	NO	63.72%
55	GBM IDH wt (grade IV)	0.383	WT	WT	WT	retained	intact	N.D.	retained	retained	-C250T	-C250T	YES	YES	NO	NO	NO	NO	WT	N.D.	WT	WT	p.Pro278Thr	YES	78.80%	EGFR: p.Ala289Val; PIK3R1: p.Met326Ile; KIT: gain; PDGFRA: gain; MET: gain
56	GBM IDH wt (grade IV)	0.751	WT	WT	WT	retained	intact	N.D.	retained	N.D.	-C228T	-C228T	N.D.	NO	YES	YES	YES	YES	WT	N.D.	WT	WT	WT	NO	81.50%	NRAS: p.Met72Ile; PIK3CA: p.Ala511Thr
57	GBM IDH wt (grade IV)	0.206	WT	WT	WT	retained	intact	intact	retained	retained	-C228T	-C228T	NO	NO	NO	NO	NO	NO	WT	N.D.	WT	WT	WT	YES	28.60%	PIK3CA: p.Glu545Lys
58	GBM IDH wt (grade IV)	0.351	WT	WT	WT	retained	intact	N.D.	retained	N.D.	-C250T	-C250T	NO	NO	YES	YES	YES	YES	WT	N.D.	WT	WT	WT	NO	40.70%	PIK3R1: p.Met326Ile
59	GBM IDH wt (grade IV)	0.346	WT	WT	WT	retained	intact	N.D.	retained	retained	-C228T	-C228T	YES	YES	YES	YES	YES	YES	WT	N.D.	WT	WT	WT	NO	25.75%
60	Anaplastic Ganglioglioma (grade III)	0.323	WT	WT	WT	retained	intact	N.D.	retained	N.D.	WT	WT	NO	NO	NO	NO	NO	NO	WT	N.D.	WT	WT	WT	NO	19.80%	KIT: gain; PDGFRA:gain; PIK3R1:gain; CDK4: gain;
GBM: glioblastoma; wt: wild-type; N.D.: not detected; MAPD: Median of the Absolute values of all Pairwise Differences); Ampl:amplification; NGS:next generation sequencing; IHC: immunohistochemistry; FISH:Fluorescence in situ hybridization
